# Supplementary material
Source: MDPI journal article supplement (https://www.mdpi.com/2076-3417/13/8/4703)
Supplement: s1 [file s1]

**Supplementary Table S1.** GenBank codes and entry short descriptions of the sequences used for phylogenetics analysis.

| GenBank code | GenBank short description                         |
|--------------|---------------------------------------------------|
| EU158797     | <i>Microtus savii</i> haplotype h6                |
| EU158778     | <i>Microtus savii</i> haplotype H2                |
| EU158796     | <i>Microtus savii</i> haplotype h2                |
| EU158792     | <i>Microtus savi</i> haplotype h1                 |
| EU158795     | <i>Microtus savii</i> haplotype h4                |
| EU158794     | <i>Microtus savii</i> haplotype h3                |
| AY513824     | <i>Microtus savii</i> haplotype 1                 |
| KT896519     | <i>Microtus savii</i> haplotype CYT3              |
| KT896520     | <i>Microtus savii</i> haplotype CYT4              |
| EU158777     | <i>Microtus savii</i> haplotype H5                |
| EU158793     | <i>Microtus savii</i> haplotype h5                |
| KT896517     | <i>Microtus savii</i> haplotype CYT1              |
| EU158801     | <i>Microtus savii</i> haplotype h8                |
| KT896518     | <i>Microtus savii</i> haplotype CYT2              |
| EU158798     | <i>Microtus savii</i> haplotype h7                |
| EU158799     | <i>Microtus savii</i> haplotype h9                |
| AY513826     | <i>Microtus savii</i> haplotype 3                 |
| AY513825     | <i>Microtus savii</i> haplotype 2                 |
| EU158800     | <i>Microtus savii</i> haplotype h10               |
| KT896521     | <i>Microtus savii</i> haplotype CYT5              |
| KT896522     | <i>Microtus savii</i> haplotype CYT6              |
| EU158780     | <i>Microtus savii</i> haplotype h11               |
| EU158781     | <i>Microtus savii</i> haplotype h12               |
| EU158782     | <i>Microtus savii</i> haplotype h13               |
| KT896523     | <i>Microtus brachycercus</i> haplotype CYT7       |
| EU158789     | <i>Microtus savii</i> haplotype h19               |
| AY513827     | <i>Microtus savii</i> haplotype 4                 |
| EU158776     | <i>Microtus savii</i> haplotype H17               |
| EU158785     | <i>Microtus savii</i> haplotype h17               |
| EU158784     | <i>Microtus savii</i> haplotype h22               |
| EU158787     | <i>Microtus savii</i> haplotype h20               |
| EU158791     | <i>Microtus savii</i> haplotype h15               |
| AY513828     | <i>Microtus savii</i> haplotype 5                 |
| EU158783     | <i>Microtus savii</i> haplotype h21               |
| EU158786     | <i>Microtus savii</i> haplotype h18               |
| EU158788     | <i>Microtus savii</i> haplotype h16               |
| EU158790     | <i>Microtus savii</i> haplotype h14               |
| KT896525     | <i>Microtus savii nebrodensis</i> haplotype CYT9  |
| KT896526     | <i>Microtus savii nebrodensis</i> haplotype CYT10 |
| KT896524     | <i>Microtus savii nebrodensis</i> haplotype CYT8  |
| EU158779     | <i>Microtus savii</i> haplotype H25               |
| EU158802     | <i>Microtus savii</i> haplotype h25               |
| EU158803     | <i>Microtus savii</i> haplotype h24               |
| EU158804     | <i>Microtus savii</i> haplotype h23               |
